# Supplementary material for: Beneficial effects of cinnamon and its extracts in the management of cardiovascular diseases and diabetes
Source: Royal Society of Chemistry journal article supplement (doi:10.1039/d1fo01935j), 2021-01-01
Supplement: d1fo01935j1.pdf [file d1fo01935j1.pdf]

**Supplementary Table 1** Clinical trials of cinnamon for CVDs and Diabetes.

| Species              | Materials                                       | Design                       | Sample size<br>(T/C)<br>M/F | Age (years)                              | Diagnosis                                                                 | Duration | Dose                                                                        | Main results                                                                                                                                                                                                                                                                                                                                    | Ref |
|----------------------|-------------------------------------------------|------------------------------|-----------------------------|------------------------------------------|---------------------------------------------------------------------------|----------|-----------------------------------------------------------------------------|-------------------------------------------------------------------------------------------------------------------------------------------------------------------------------------------------------------------------------------------------------------------------------------------------------------------------------------------------|-----|
| NR                   | cinnamon                                        | R, PC                        | 60 (30/30)<br>M/F: 30/30    | T: $52.0 \pm 6.87$<br>C: $52.0 \pm 5.85$ | T2DM                                                                      | 40 days  | 1, 3, or 6 g,<br>qd                                                         | Reduced mean fasting serum glucose, triglyceride, LDL cholesterol, and total cholesterol levels, no significant changes were noted in the placebo groups. Changes in HDL cholesterol were not significant.                                                                                                                                      | 15  |
| <i>C. cassia</i>     | aqueous extract<br>of cinnamon<br>(Cinnulin PF) | R, DB,<br>PC                 | 21 (11/10)<br>M/F: NR       | T: $45.8 \pm 3.6$<br>C: $45.6 \pm 2.7$   | impaired<br>fasting blood<br>glucose with<br>BMI ranging<br>from 25 to 45 | 12 weeks | 250 mg,<br>bid                                                              | Increased FRAP and SH group oxidation, decreased plasma MDA levels. Effects were larger after 12 than 6 weeks.                                                                                                                                                                                                                                  | 16  |
| <i>C. zeylanicum</i> | refined<br>cinnamon                             | phase I<br>clinical<br>trial | 28<br>M/F: 14/14            | $38.8 \pm 10.4$<br>(T/C: NR)             | healthy adults                                                            | 3 months | increased<br>at monthly<br>intervals<br>(85 mg,<br>250 mg<br>and 500<br>mg) | Both SBP and DBP reduced significantly. Full blood count, renal function tests, liver function tests, FBG, HDL-c, VLDL-c and triglycerides remained within the normal range without any significant alteration during the 3 months. A significant reduction in the TC and LDL-c. No serious adverse effects (including hypersensitivity) noted. | 46  |

|                      |                                                             |               |                            |                                  |                                           |          |          |                                                                                                                                                                                                                                             |    |
|----------------------|-------------------------------------------------------------|---------------|----------------------------|----------------------------------|-------------------------------------------|----------|----------|---------------------------------------------------------------------------------------------------------------------------------------------------------------------------------------------------------------------------------------------|----|
| NR                   | cinnamon powder capsules                                    | R, TB, PC     | 109 (55/54)<br>M/F: 64/45  | T: 60.5 ± 10.7<br>C: 59.9 ± 9.2  | T2DM                                      | 3 months | 1g, qd   | Lowering serum HbA1C in type 2 diabetics with HbA1C >7.0                                                                                                                                                                                    | 60 |
| <i>C. verum</i>      | raw, dried powder from cinnamon sticks (inner bark of tree) | R, PC, Pa     | 204 (40/39)<br>M/F: 31/48  | T: 54.15 ± 1.0<br>C: 53.64 ± 1.3 | T2DM                                      | 8 weeks  | 3g, qd   | Significant reduced TC, LDL, and HDL levels.                                                                                                                                                                                                | 82 |
| NR                   | cinnamon powder                                             | R, DB, Pa     | 116 (58/58 )<br>M/F: 64/52 | T: 44.3 ± 7.2<br>C: 45.1 ± 8.4   | metabolic syndrome                        | 16 weeks | 3g, qd   | Significantly greater decrease in FBG, glycosylated haemoglobin, waist circumference and BMI; significantly greater improved waist-hip ratio, BP, TC, LDL-C, TG, and HDL-C; significantly reduced prevalence of defined metabolic syndrome. | 83 |
| NR                   | cinnamon capsules                                           | R, DB, PC, Pa | 45 (23/22)<br>M/F: NR      | 20-65<br>(T/C: NR)               | nonalcoholic fatty liver disease patients | 12 weeks | 1.5g, qd | Significant decreases in HOMA index, FBG, TC, TG, ALT, AST, GGT, and hs-CRP were seen, but there was no significant change in serum HDL levels. In both groups, LDL decreased significantly.                                                | 84 |
| <i>C. zeylanicum</i> | cinnamon powdered spice                                     | R, PC, SB, CO | 9 (9/9)<br>M/F: 3/6        | 26.2 ± 3                         | healthy subjects                          | 1 day    | 3g, qd   | No change in gastric emptying parameters, postprandial triacylglycerol or glucose concentrations, oxidative stress, arterial function or appetite.                                                                                          | 85 |

|                     |                                |               |                          |                                      |                                        |          |             |                                                                                                                                                                                                                                              |     |
|---------------------|--------------------------------|---------------|--------------------------|--------------------------------------|----------------------------------------|----------|-------------|----------------------------------------------------------------------------------------------------------------------------------------------------------------------------------------------------------------------------------------------|-----|
| <i>C. cassia</i>    | cinnamon capsules              | R, DB, PC     | 57 (29/28)<br>M/F: 28/29 | T: 63.6<br>C: 58.0                   | T2DM                                   | 3 months | 500 mg, bid | No significant change in fasting glucose, lipid, A1C, or insulin levels.                                                                                                                                                                     | 86  |
| <i>C. burmannii</i> | cinnamon powder capsules       | R, DB, PC, Pa | 36 (18/18)<br>M/F: 0/36  | T: 44.66 ± 11.22<br>C: 49.11 ± 7.45  | Rheumatoid arthritis                   | 8 weeks  | 500 mg, qd  | Significant decrease of serum levels of CRP and TNF- $\alpha$ ; significantly lower DBP. No significant changes in FBG, lipid profile, liver enzymes, or ESR.                                                                                | 118 |
| NR                  | cinnamon extract capsules      | R, DB, PC, Pa | 39 (20/19)<br>M/F: 15/24 | T: 58.90 ± 7.93<br>C: 56.26 ± 9.46   | T2DM                                   | 8 weeks  | 3g, qd      | No beneficial impacts on plasma levels of NF-kB, SIRT1 and systemic inflammation factors including hs-CRP, IL-6 and TNF- $\alpha$ .                                                                                                          | 119 |
| NR                  | cinnamon extract capsules      | R, DB, PC, Pa | 39 (20/19)<br>M/F: 15/24 | T: 58.90 ± 7.93<br>C: 56.26 ± 9.46   | T2DM                                   | 8 weeks  | 3g, qd      | No significant difference in ICAM-1 and VCAM-1 between the groups.                                                                                                                                                                           | 120 |
| NR                  | water-soluble cinnamon extract | R, PC, DB, Pa | 22 (12/10)<br>M/F: 11/11 | T: 46.3 ± 8.8<br>C: 45.6 ± 11.1      | prediabetes and the metabolic syndrome | 12 weeks | 250 mg, bid | Significant decreases in FBG, SBP, increases in lean mass, and statistically significant decreases in body fat. No significant changes in clinical blood chemistries.                                                                        | 151 |
| <i>C. cassia</i>    | cinnamon powder                | R, PC, Pa     | 58 (30/28)<br>M/F: 26/32 | T: 54.90 ± 10.14<br>C: 54.43 ± 12.53 | T2DM                                   | 12 weeks | 2g, qd      | Significantly decrease in HbA1c, mean SBP and DBP, FPG, waist circumference and BMI. No significant differences in serum lipid profiles of total cholesterol, triglycerides, HDL and LDL cholesterols neither between nor within the groups. | 152 |

|                  |                                                                                                                                      |               |                           |                                 |      |          |             |                                                                                                                                                                                                                                                                                                                                               |     |
|------------------|--------------------------------------------------------------------------------------------------------------------------------------|---------------|---------------------------|---------------------------------|------|----------|-------------|-----------------------------------------------------------------------------------------------------------------------------------------------------------------------------------------------------------------------------------------------------------------------------------------------------------------------------------------------|-----|
| <i>C. cassia</i> | cinnamon capsules contained 400 mg of freshly ground cinnamon of broken cassia with zinc gluconate (21 mg) and tri-calcium phosphate | R, PC         | 59 (29/30)<br>M/F: 35/24  | T: 61.7 ± 6.3<br>C: 64.4 ± 15.4 | T2DM | 12 weeks | 1.2 g, qd   | SBP declined from baseline values in the cinnamon group. However, the by-treatment difference in change-from-baseline SBP was a function of regression to the mean rather than a treatment-associated change.                                                                                                                                 | 153 |
| NR               | cinnamon bark powder                                                                                                                 | R, TB, PC, Pa | 138 (69/69)<br>M/F: 75/63 | T: 52.1 ± 9.7<br>C: 53.2 ± 8.5  | T2DM | 3 months | 500 mg, bid | Improvement of all anthropometric (BMI, body fat, and visceral fat), glycemic (FPG, 2hpp, HbA1C, Fasting Insulin, and Insulin Resistance), and lipids (TC, LDL-c and HDL-c) outcomes (except for TG level). All observed changes (except for TC and LDL-c) were significantly more prominent in patients with higher baseline BMI (BMI ≥ 27). | 250 |

|                              |                                                                                                    |               |                           |                                                                                   |      |          |                                                                                  |                                                                                                                                                                                                                                                                    |     |
|------------------------------|----------------------------------------------------------------------------------------------------|---------------|---------------------------|-----------------------------------------------------------------------------------|------|----------|----------------------------------------------------------------------------------|--------------------------------------------------------------------------------------------------------------------------------------------------------------------------------------------------------------------------------------------------------------------|-----|
| NR                           | One cinnamon capsule contained 112 mg of the aqueous cinnamon extract TC112 prepared by Finzelberg | R, DB, PC     | 65 (33/32)<br>M/F: 44/21  | T: $62.8 \pm 8.37$<br>C: $63.7 \pm 7.17$                                          | T2DM | 4 months | 1g, tid                                                                          | A significantly reduction of FPG in the cinnamon group than in the control group. No significant differences of HbA1c, lipid profiles were observed.                                                                                                               | 251 |
| <i>Chinese C. aromaticum</i> | Each cinnamon tablet contains 60 mg of cinnamon extract isolated from 2.4 g of cinnamon            | R, DB, PC     | 66 (20/46)<br>M/F: 25/41  | T1: $62.4 \pm 7.9$ (120 mg/d)<br>T2: $58.9 \pm 6.4$ (360 mg/d)<br>C: $60 \pm 5.9$ | T2DM | 3 months | low-dose and high-dose supplementation with cinnamon extract at 120 and 360 mg/d | Both HbA1c and FBG levels were significantly reduced in patients in the low-dose and high-dose groups. The blood TG levels were also significantly reduced in the low-dose group. The blood levels of TC, HDL-C, LDL-L, and liver transaminase remained unchanged. | 252 |
| <i>C. verum</i>              | capsule contained cinnamon powder                                                                  | R, TB, PC, Pa | 140 (71/69)<br>M/F: 43/97 | T: $61.7 \pm 11.7$<br>C: $60.8 \pm 10.8$                                          | T2DM | 3 months | 1.5g, bid                                                                        | Statistically significant reductions of HbA1c and fasting venous glucose.                                                                                                                                                                                          | 253 |

|    |                        |                  |                          |                                    |      |         |         |                                                                                                                                                                            |
|----|------------------------|------------------|--------------------------|------------------------------------|------|---------|---------|----------------------------------------------------------------------------------------------------------------------------------------------------------------------------|
| NR | cinnamon pills         | R, DB,<br>PC     | 57 (28/29)<br>M/F: 26/29 | T: 14.7 ± 1.4<br>C: 15.2 ± 1.7     | T1DM | 90 days | 1g, qd  | No significant differences in final A1C, 255<br>change in A1C, total daily insulin intake, or<br>number of hypoglycemic episodes between<br>the cinnamon and placebo arms. |
| NR | capsule of<br>cinnamon | R, TB,<br>PC, Pa | 39 (20/19)<br>M/F: 15/24 | T: 58.90 ± 7.93<br>C: 56.26 ± 9.46 | T2DM | 8 weeks | 1g, tid | No significant changes were observed in in 256<br>the level of FBG, insulin, HbA1c, HOMA-<br>IR, carboxymethyl lysine, total antioxidant<br>capacity, and MDA.             |

---

ALT, alanine aminotransferase; AST, aspartate aminotransferase; bid, twice a day; BMI, body mass index; C, control group; CO, cross-over; DB, double-blind; DBP, diastolic blood pressure; ESR, erythrocyte sedimentation rate; FBG, fasting blood glucose; F, female; FPG, fasting plasma glucose; FRAP, ferric reducing antioxidant power; GGT, gamma glutamine transpeptidase; HbA1c, Hemoglobin A1c; HDL-c, high-density lipoprotein cholesterol; HOMA-IR, homeostatic model assessment for insulin resistance; hs-CRP, high-sensitivity C-reactive protein; LDL-c, low density lipoprotein cholesterol; M, male; MDA, malondialdehyde; NR, not reported; Pa, parallel; PC, placebo-controlled; qd, once a day; R, randomized; SB, single-blind; SBP, systolic blood pressure; SH, plasma thiol; T, treatment group; TB, triple-blind; TC, total cholesterol; TG, triglyceride; tid, three times a day; T1DM, diabetes mellitus type 1; T2DM, diabetes mellitus type 2; VLDL, very low-density lipoprotein.
